# Supplementary material
Source: PubMed Central journal article supplement (PMC3906342)
Supplement: cc-12-3564-s01.pdf [file cc-12-3564-s01.pdf]

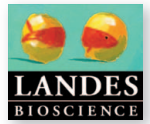

## **Supplemental Material to:**

**Tania Velletri, Francesco Romeo, Paola Tucci,  
Angelo Peschiaroli, Margherita Annicchiarico-Petruzzelli,  
Maria Victoria Niklison-Chirou, Ivano Amelio,  
Richard A Knight, Tak W Mak, Gerry Melino,  
and Massimiliano Agostini\***

**GLS2 is transcriptionally regulated by p73 and contributes  
to neuronal differentiation**

**Cell Cycle 2013; 12(22)**

**<http://dx.doi.org/10.4161/cc.26771>**

**<http://www.landesbioscience.com/journals/cc/article/26771>**

**A**

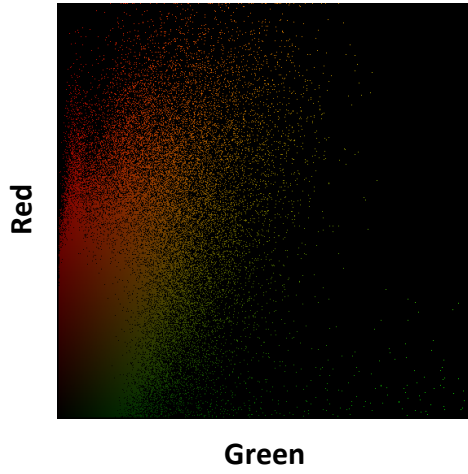

**B**

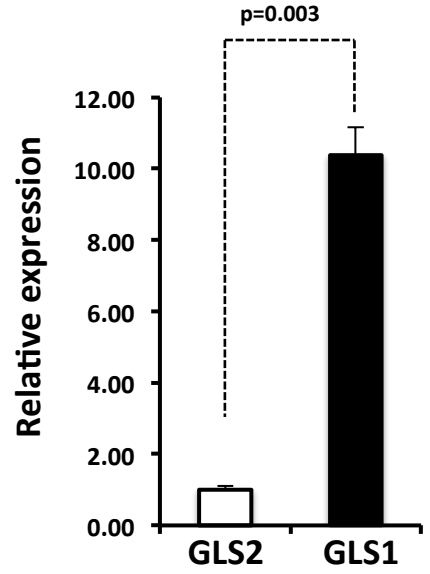

**C**

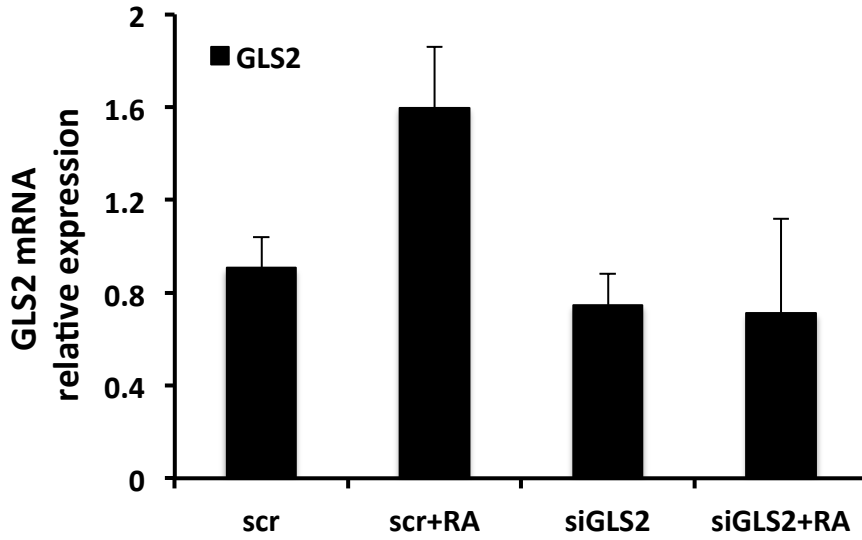

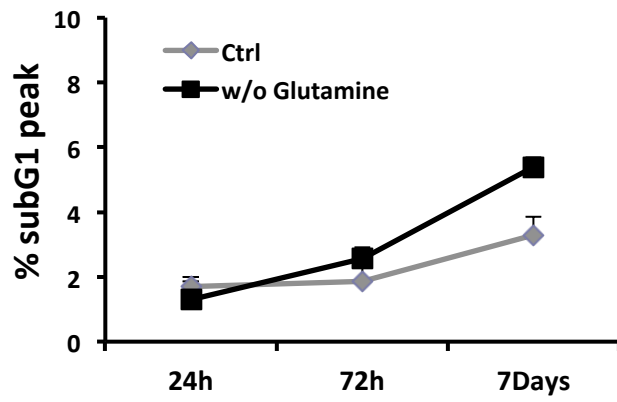

**A**

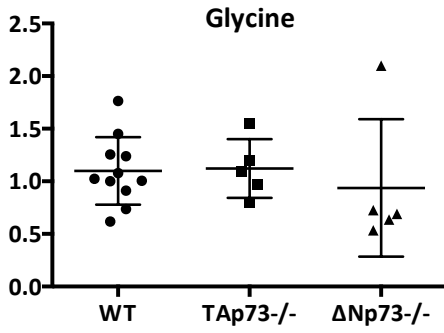

**B**

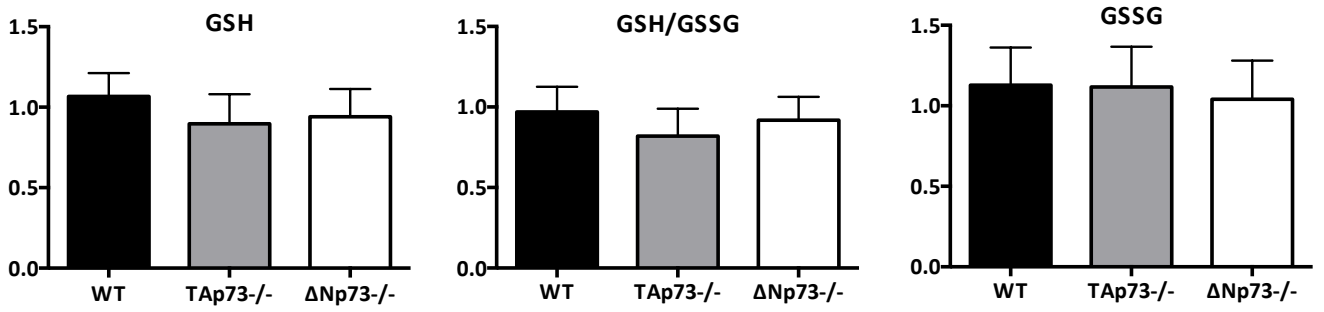

### **Supplementary figures:**

**Figure S1:** A) Scatter plot produced by colocalization analysis software and indicating differences of pixels distribution in analysed image figure 1G. B) Expression of GLS1 in SHSY-5Y cells. Real time PCR data are normalized to the housekeeping gene GAPDH relative to GLS2. C) Efficacy of siRNA targeted to GLS2. Validation of GLS2 siRNA was performed by real time PCR.

**Figure S2: Glutamine withdrawal does not affect cortical neuron viability.** Cortical neurons were harvested at the indicated times and cell death was evaluated by FACS analysis.

**Figure S3:** Intracellular levels of A) Glycine and B) GSH and GSSG assessed in DIV7 cortical neurons derived from wild-type (WT), TAp73<sup>-/-</sup> and DNp73<sup>-/-</sup> mice. The metabolites were evaluated as described in Methods.
